# Supplementary material for: Automatic multiple zebrafish larvae tracking in unconstrained microscopic video conditions
Source: PubMed Central journal article supplement (PMC5730596; doi:10.1038/s41598-017-17894-x), 2017-12-14
Supplement: 41598_2017_17894_MOESM1_ESM.pdf [file 41598_2017_17894_MOESM1_ESM.pdf]

# Automatic multiple zebrafish larvae tracking in unconstrained microscopic video conditions

Xiaoying Wang, Eva Cheng, Ian S. Burnett, Yushi Huang, Donald Wlodkovic

## Supplementary Table S1

Table S1. Multiple object tracking accuracy for the systems evaluated

| No.     | MOTP (pixels) |                     |              |                 | MOTA      |                    |              |                 |
|---------|---------------|---------------------|--------------|-----------------|-----------|--------------------|--------------|-----------------|
|         | idTracker     | Segment + idTracker | Loli Tracker | Proposed system | idTracker | Segment+ idTracker | Loli Tracker | Proposed system |
| 1       | 11.388        | NaN*                | 11.662       | 6.346           | 1.000     | NaN*               | 0.990        | 0.988           |
| 2       | 21.434        | 12.176              | 18.395       | 15.024          | 0.541     | 0.922              | 0.921        | 0.853           |
| 3       | 20.648        | 20.879              | 18.854       | 8.113           | 1         | 0.975              | 0.985        | 0.998           |
| 4       | 16.728        | 17.665              | 23.208       | 10.669          | 0.987     | 0.840              | 0.987        | 0.993           |
| 5       | 21.545        | 21.727              | 21.890       | 15.525          | -0.01     | 0.895              | 0.139        | 0.994           |
| 6       | 13.151        | 12.562              | 15.020       | 12.786          | -0.27     | -0.0864            | 0.914        | 0.936           |
| 7       | 25.230        | 43.746              | 80.630       | 30.082          | 0.005     | 0.725              | 0.504        | 0.954           |
| 8       | 53.096        | 59.666              | 98.936       | 36.901          | -0.39     | 0.739              | 0.209        | 0.956           |
| 9       | 29.921        | 48.739              | 142.834      | 15.960          | 0.673     | -0.1071            | 0.327        | 0.989           |
| 10      | 219.329       | 27.532              | 189.975      | 25.121          | -0.18     | 0.133              | 0.906        | 0.920           |
| Average | 43.247        | 29.410              | 62.14        | <b>17.65</b>    | 0.33      | 0.56               | 0.69         | <b>0.96</b>     |

\* No valid data generated due to the running error when testing sequence 1.

## Supplementary Table S2

Table S2. Total number of swapped individual identities

| Mismatch ratio |           |                     |              |            |
|----------------|-----------|---------------------|--------------|------------|
| No.            | idTracker | Segment + idTracker | Loli Tracker | Proposed   |
| 1              | 6         | NaN                 | 2            | 0          |
| 2              | 2         | 3                   | 4            | 3          |
| 3              | 0         | 0                   | 0            | 0          |
| 4              | 4         | 0                   | 0            | 0          |
| 5              | 3         | 2                   | 6            | 0          |
| 6              | 1         | 1                   | 1            | 2          |
| 7              | 2         | 1                   | 3            | 1          |
| 8              | 11        | 41                  | 24           | 14         |
| 9              | 4         | 17                  | 3            | 0          |
| 10             | 4         | 8                   | 0            | 8          |
| <b>Average</b> | 3.7       | 8.1                 | 4.3          | <b>2.8</b> |

# Supplementary Note

## Building training samples for a short video

October 31, 2017

For a short video where the length is less than the training sample required, duplicate video frames are added to the beginning of the video sequence to estimate background model. Fig. 1 illustrates the process of constructing the training samples from a short video.

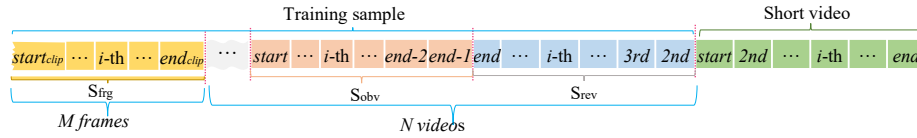

Figure 1: Building training samples for a short video.

The green frame series in Fig. 1 indicates the original time-lapse zebrafish larvae microscopic short video  $\mathbb{V}$ . The frames in front of this video are its training sample  $\mathbb{S}$ , used to estimate the background model parameters of  $\mathbb{V}$ . The set of training samples  $\mathbb{S}$  consists of:  $S_{obv}$ , frames from the original short video  $\mathbb{V}$  in obverse order from  $[start, end - 1]$  frames, shown by the pink frame series;  $S_{rev}$ , frames from the original video short video  $\mathbb{V}$  in reverse order from  $[end, 2nd]$  frames, shown as the light blue; and,  $S_{frag}$ , the video fragment shown in orange. The obverse order frame series  $S_{obv}$  and reverse order frame series  $S_{rev}$  are alternately linked to each other to construct the training sample, and the last frame to connect to the original video is the reverse order frame to ensure a smooth background transition between the last frame in the reverse order frame series to the first frame of the original microscopic short video.

To construct a training set with length of  $L_{sample}$  images, a video fragment,  $S_{frag}$ , taken from the short video studied will be added to the training set for the set length requirement when the  $S_{obv}$  and  $S_{rev}$  series do not have exact  $L_{sample}$  images.

The required number of videos,  $N$  and number of frames,  $M$ , are calculated using Eq. (1) and Eq. (2).

$$N = L_{sample} \setminus N_{frames} \quad (1)$$

where the MATLAB built-in function `idivide` is applied for the integer division with fractional quotients being rounded toward negative infinity to the nearest integer for implementation.

$$M = L_{sample} - L_{sample} \setminus N_{frames} \quad (2)$$

Based on the required number of videos  $N$  (in obverse order and reverse order), the video fragment  $S_{frag}$  is constructed according to Eq. (3).

$$S_{frag} = \begin{cases} \{S_{rev}(i) \mid i = M + 1, \dots, 3, 2\}, & \frac{N}{2} \text{ is even} \\ \{S_{obv}(i) \mid i = 2, \dots, 3, M + 1\}, & \frac{N}{2} \text{ is odd} \end{cases} \quad (3)$$
